# FOCUS

THE JOURNAL OF LIFELONG LEARNING IN PSYCHIATRY

## Schizophrenia

*Guest Editors, John M. Kane, M.D.  
Peter F. Buckley, M.D.  
Stephen R. Marder, M.D.*

### IN CLINICAL SYNTHESIS:

New-Onset Schizophrenia:  
Pharmacologic Treatment

*John M. Kane, M.D.*

Schizophrenia  
Host Vulnerability and Risk of  
Metabolic Disturbances During  
Treatment with Antipsychotics

*Peter F. Buckley, M.D. et al.*

Neurocognition as a Treatment  
Target in Schizophrenia

*Stephen R. Marder, M.D.*

AND INFLUENTIAL PUBLICATIONS . . .
